# Supplementary material
Source: Springer Nature journal article supplement (https://www.springermedizin.de/resource/supplementary/12950_2009_126_MOESM1_ESM.pdf/9558138)

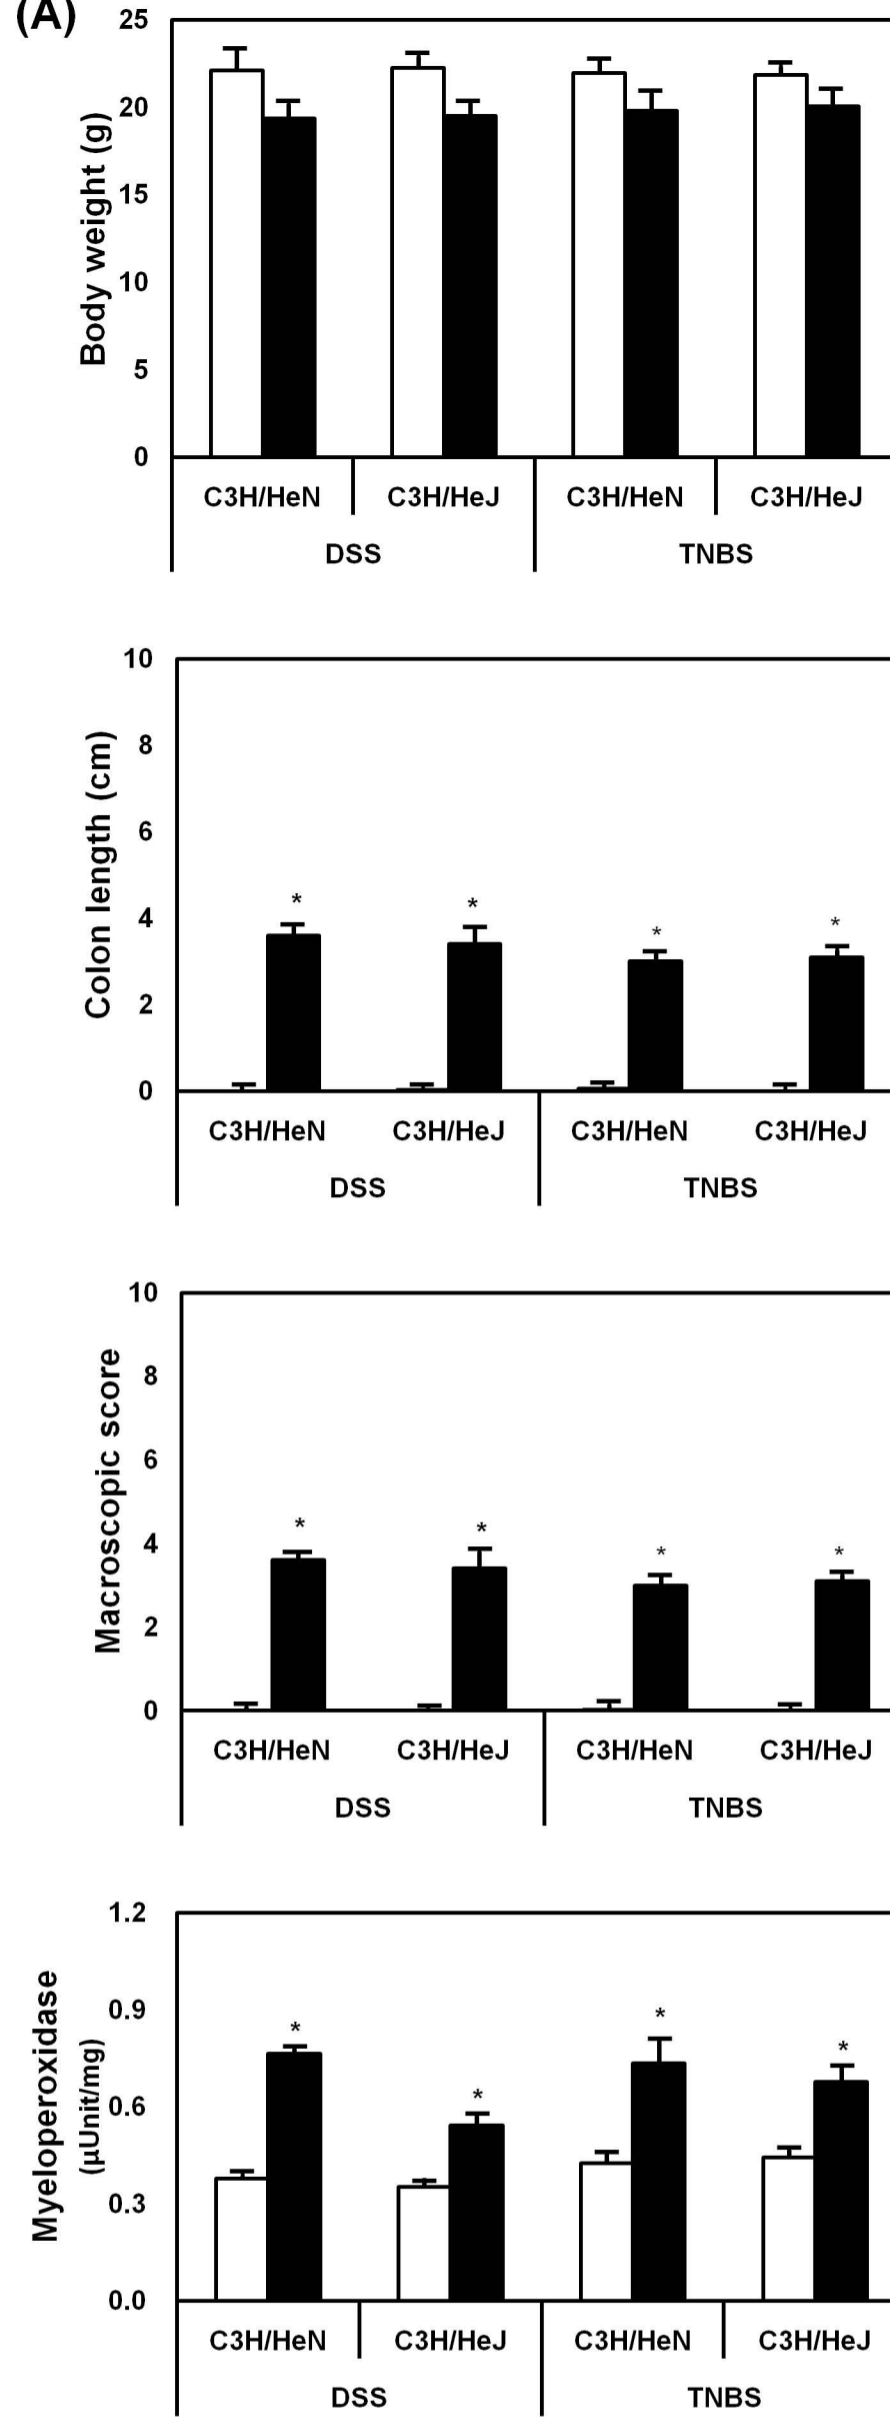

**(B)**

DSS

TNBS

C3H/HeN

C3H/HeJ

C3H/HeN

C3H/HeJ

NOR

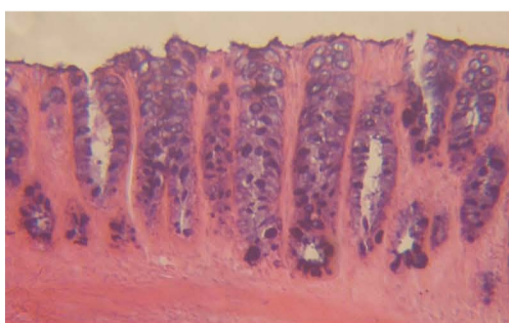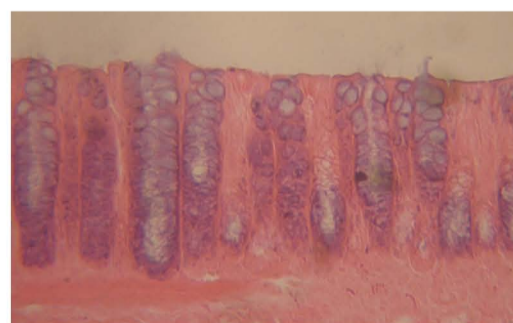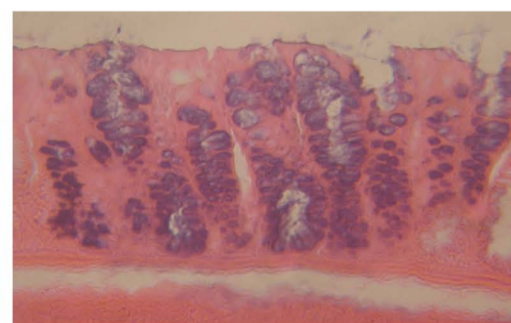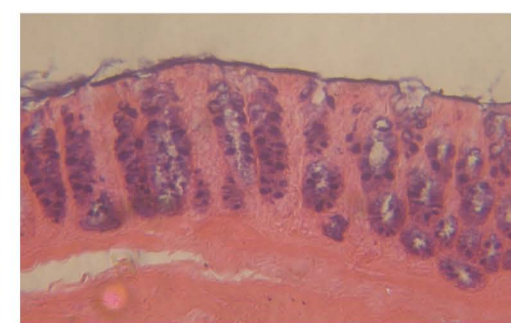

CON

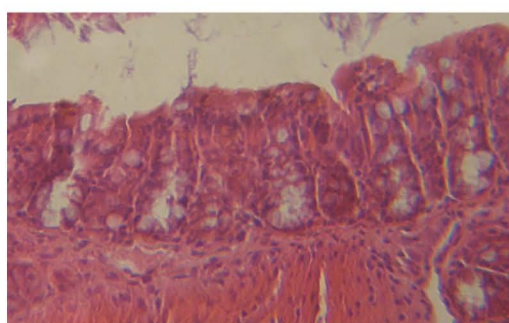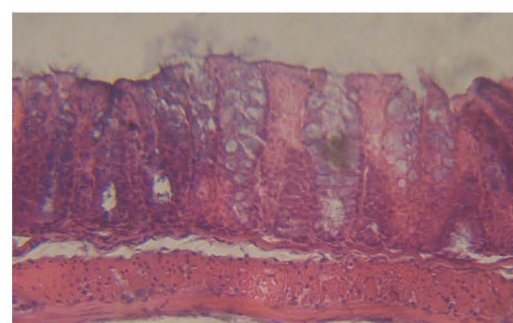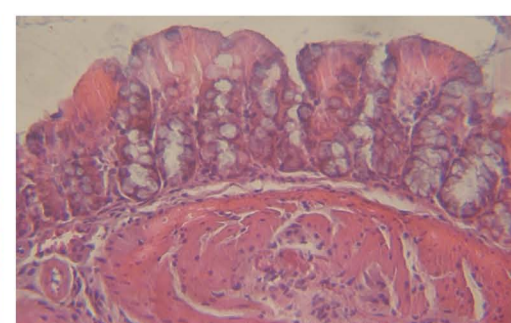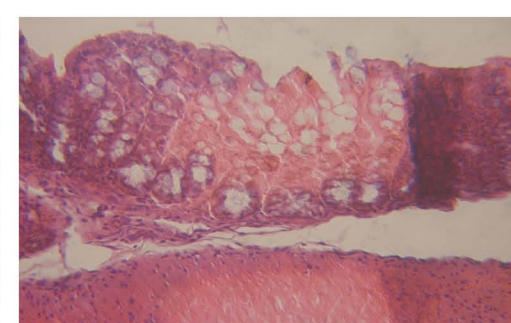

Supplement: MOESM1 [file 9558138]
